# Supplementary material for: Anthropogenic Influence on Long-Term Surface Air Temperature Trends: Attribution of Temperature Changes Across East Asia
Source: Research Square preprint supplement (doi:10.21203/rs.3.rs-207433/v2), 2021-07-08
Supplement: Supplementary file 1 [file 3f982ae4a46c66580c77347d.docx]

**Anthropogenic influence on long-term surface air temperature trends: Attribution of temperature changes across East Asia**

S. Allabakash and S. Lim*

Korea Institute of Civil Engineering and Building Technology, Ilsan, Goyang, South Korea

*Corresponding author: S. Lim; 283, Korea Institute of Civil Engineering and Building Technology, Goyang-daero, Ilsanseo-gu, Goyang-si, Gyeonggi-do 10223, South Korea, ([[slim@kict.re.kr](mailto:slim@kict.re.kr)](mailto:email@address.edu))).

Figure S1. Temporal variation of annual mean temperature anomaly responses to land use (LU) forcing averaged across East Asia and individual countries from observations (CRU and HadCRUT4) and multi-model mean simulations (CMIP6) for the period 1850–2014 (CRU: 1901–2018, HadCRUT4: 1850–2019). Shaded bands are multi-model ranges.

Figure S2. As for Figure S1 but showing temperature anomaly responses to solar (SOL) forcing.


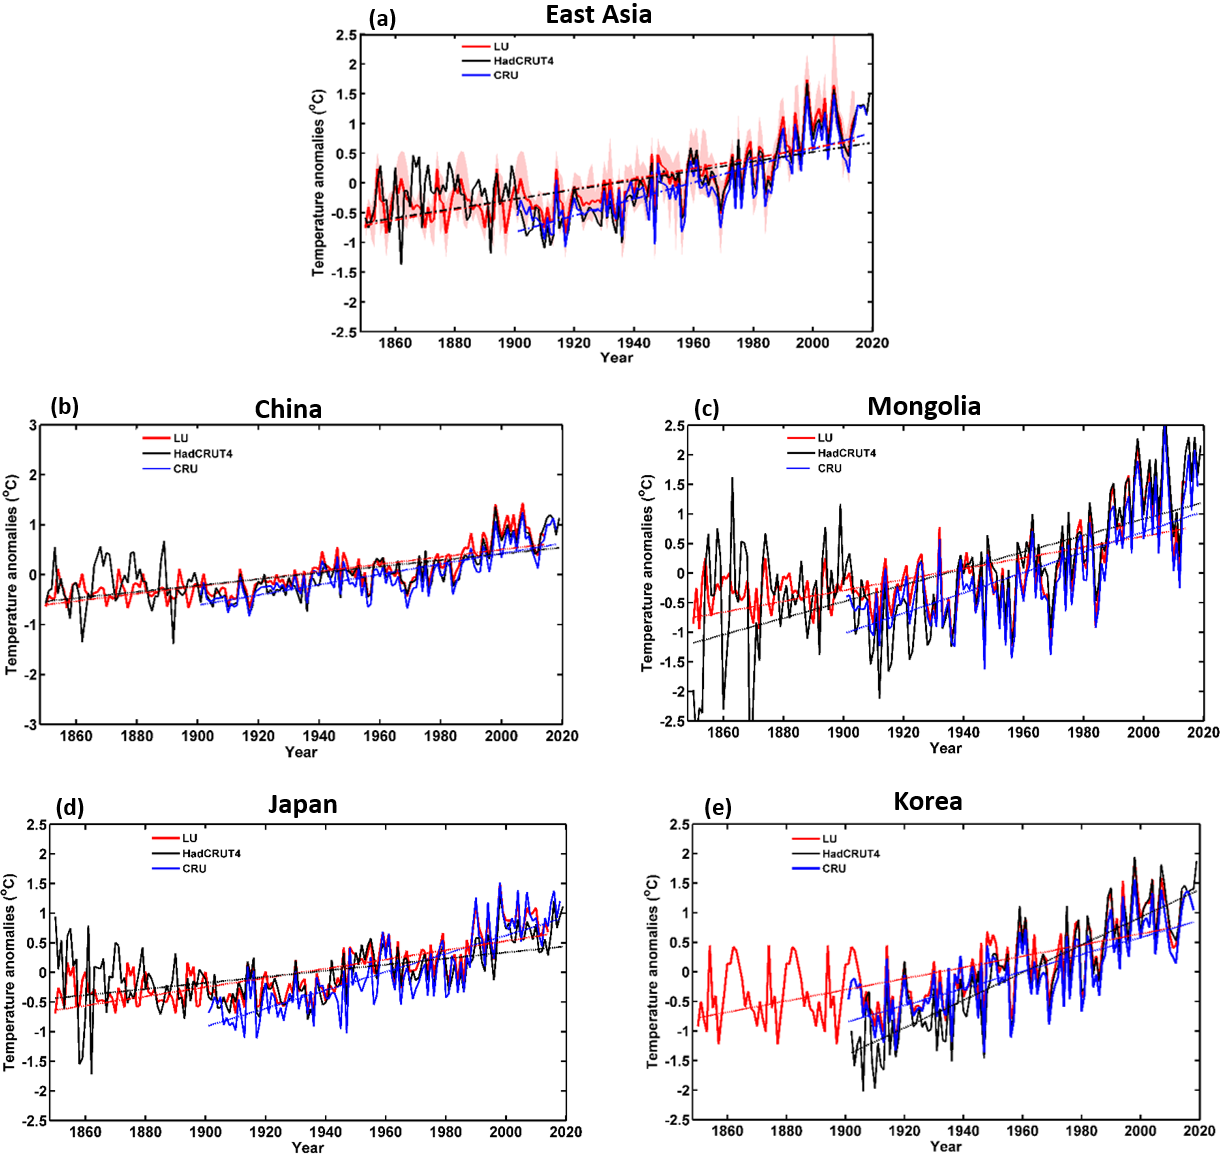


Figure S1. Temporal variation of annual mean temperature anomaly responses to land use (LU) forcing averaged across East Asia and individual countries from observations (CRU and HadCRUT4) and multi-model mean simulations (CMIP6) for the period 1850–2014 (CRU: 1901–2018, HadCRUT4: 1850–2019). Shaded bands are multi-model ranges.


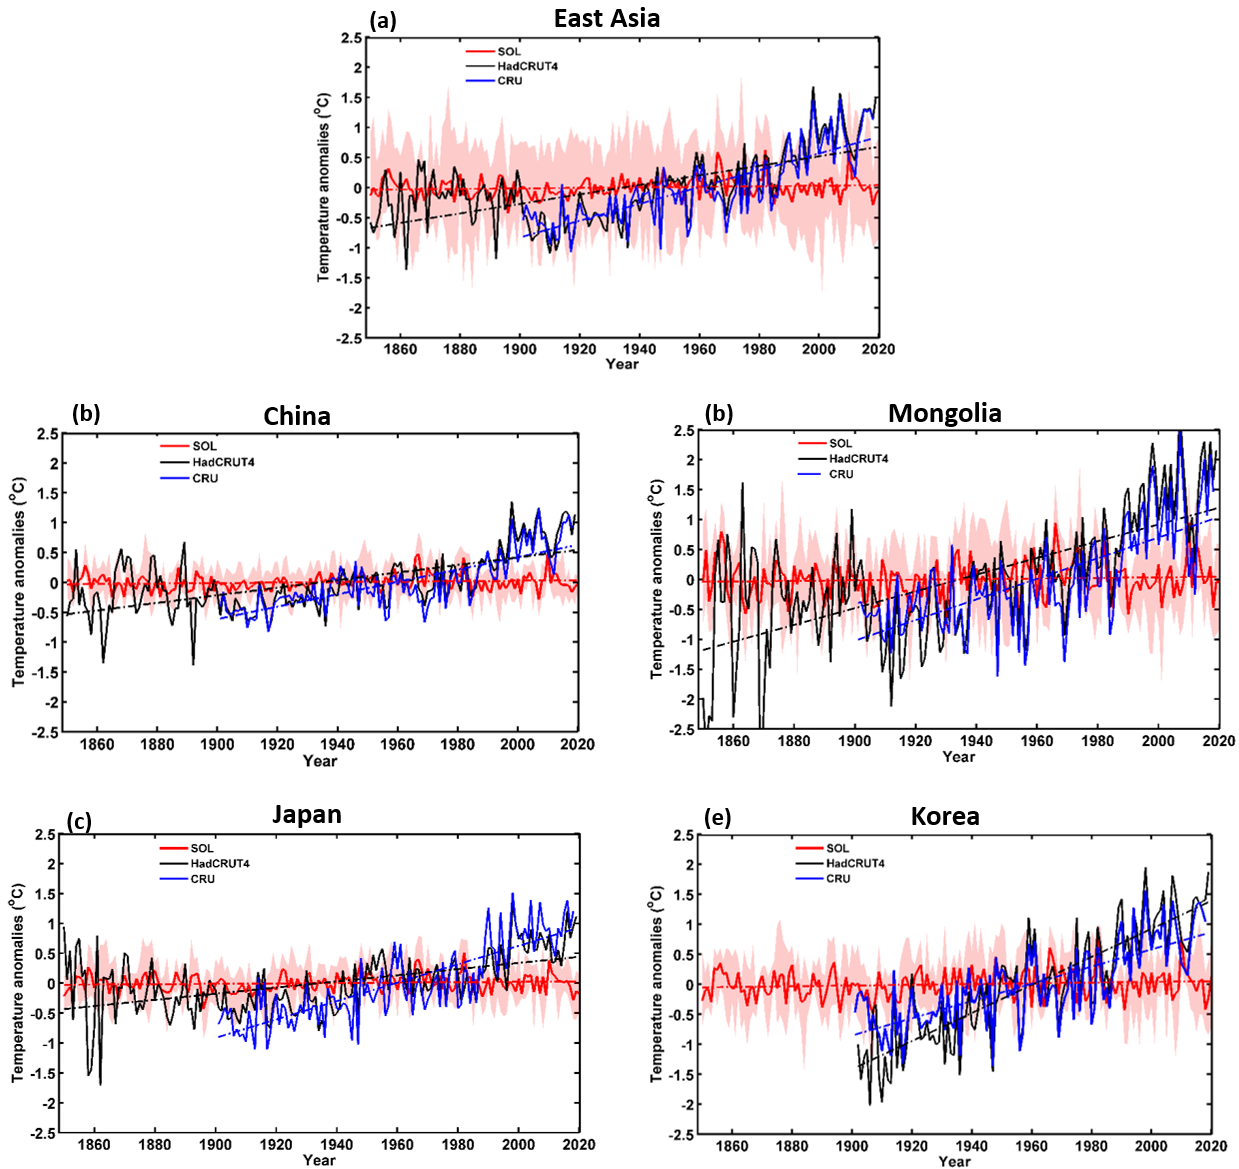


Figure S2. As for Figure S1 but showing temperature anomaly responses to solar (SOL) forcing.
